# Supplementary material for: Functional diversification of the GALA type III effector family contributes to Ralstonia solanacearum adaptation on different plant hosts
Source: PubMed Central journal article supplement (PMC3263339; doi:10.1111/j.1469-8137.2011.03854.x), 2011-12
Supplement: nph0192-0976-SD2.pdf [file nph0192-0976-SD2.pdf]

Table S1: Bacterial strains and plasmids used in this study

| <b>Strains</b>                                |                                                                                                                                       |                                                              |
|-----------------------------------------------|---------------------------------------------------------------------------------------------------------------------------------------|--------------------------------------------------------------|
| <i>Escherichia coli</i> DH5 $\alpha$          | F <sup>+</sup> <i>recA lacZ</i> DM15                                                                                                  | Bethesda Research Laboratory                                 |
| <i>Ralstonia solanacearum</i>                 |                                                                                                                                       |                                                              |
| GMI1000                                       | Wild-type strain                                                                                                                      | (Boucher <i>et al.</i> , 1987)                               |
| GRS447                                        | $\Delta$ <i>gala2,4,5,6,7</i> , <i>gala1::</i> $\Omega$ , <i>gala3::</i> $\Omega$ , Gm <sup>r</sup> Spc <sup>r</sup> Kan <sup>r</sup> | (Angot <i>et al.</i> , 2006)                                 |
| GRS460                                        | $\Delta$ <i>gala2,6,7</i> , <i>gala3::</i> $\Omega$ , Spc <sup>r</sup>                                                                | (Angot <i>et al.</i> , 2006)                                 |
| GRS536                                        | $\Delta$ <i>gala2</i> , <i>gala3::</i> $\Omega$ , <i>gala7::</i> pCZ367, Spc <sup>r</sup> Gm <sup>r</sup>                             | This work                                                    |
| GRS537                                        | $\Delta$ <i>gala2</i> , <i>gala3::</i> $\Omega$ , <i>gala6::</i> pCZ367, Spc <sup>r</sup> Gm <sup>r</sup>                             | This work                                                    |
| GRS538                                        | $\Delta$ <i>gala6,7</i> , <i>gala3::</i> $\Omega$ , Spc <sup>r</sup>                                                                  | This work                                                    |
| GRS539                                        | $\Delta$ <i>gala2,6,7</i> , Kan <sup>r</sup>                                                                                          | This work                                                    |
| <i>Pseudomonas syringae</i> pv. <i>tomato</i> |                                                                                                                                       |                                                              |
| DC3000                                        | Wild-type strain, Rif <sup>r</sup>                                                                                                    |                                                              |
| DC3000 $\Delta$ CEL                           | $\Delta$ <i>avrE-shcN</i> , Rif <sup>r</sup> Spc <sup>r</sup>                                                                         | (Alfano <i>et al.</i> , 2000)                                |
| <b>Plasmids</b>                               |                                                                                                                                       |                                                              |
| pCZ367                                        | pUC18-derived vector used for insertional mutagenesis of <i>gala6</i> and <i>gala7</i>                                                | (Cunnac <i>et al.</i> , 2004b)                               |
| pEDV6                                         | pAvrRPS4::AvrRPS4 <sub>1-136</sub> -HA-GW                                                                                             | (Sohn <i>et al.</i> , 2007; Fabro <i>et al.</i> , Submitted) |
| pPR181                                        | pENTRY-GALA1*                                                                                                                         | This work                                                    |
| pPR156                                        | pENTRY-GALA3*                                                                                                                         | This work                                                    |
| pPR126                                        | pDON207-GALA4*                                                                                                                        | This work                                                    |
| pPR134                                        | pDON207-GALA5*                                                                                                                        | This work                                                    |
| pPR122                                        | pDON207-GALA6*                                                                                                                        | This work                                                    |
| pNP200                                        | pDON207-GALA7*                                                                                                                        | This work                                                    |
| pPR179                                        | pEDV6-GALA1*                                                                                                                          | This work                                                    |
| pPR180                                        | pEDV6-GALA3*                                                                                                                          | This work                                                    |
| pPR136                                        | pEDV6-GALA4*                                                                                                                          | This work                                                    |
| pPR137                                        | pEDV6-GALA5*                                                                                                                          | This work                                                    |
| pPR124                                        | pEDV6-GALA6*                                                                                                                          | This work                                                    |
| pPR103                                        | pEDV6-GALA7*                                                                                                                          | This work                                                    |

\*Spc<sup>r</sup>, Gm<sup>r</sup>, Kan<sup>r</sup>, Rif<sup>r</sup> = resistant to spectinomycin, gentamycin, kanamycin and rifampicin

#### Reference

Boucher CA, Barberis PA, Trigalet AP, Demery DA. 1985. Transposon mutagenesis of *Pseudomonas solanacearum*: isolation of Tn5-induced avirulent mutants. *Journal of General Microbiology* 131: 2449-2457

Table S2: Oligonucleotides used in this study

| <b>GALA cloning</b>          |                                                                          |                                        |
|------------------------------|--------------------------------------------------------------------------|----------------------------------------|
| oNP572                       | GGAGATAGAACCATGGGATACCACTTCTGGGCGG                                       | 5'GALA4                                |
| oNP573                       | CAAGAAAGCTGGGTCTCMCGTCTTGAGCACGG                                         | 3'GALA4                                |
| oNP574                       | GGAGATAGAACCATGAAACCTGTCGCTCCGGTTGG                                      | 5'GALA5                                |
| oNP575                       | CAAGAAAGCTGGGTCTCMGTGCCGCATCGTCA                                         | 3'GALA5                                |
| oNP576                       | GGAGATAGAACCATGGTGTGCGCATTCCACC                                          | 5'GALA6                                |
| oNP577                       | CAAGAAAGCTGGGTCTCMGTCCCTCCACCGCA                                         | 3'GALA6                                |
| oNP526                       | GGAGATAGAACCATGATGTTCAAGCGCATCGAC                                        | 5'GALA7                                |
| oNP527                       | CAAGAAAGCTGGGTCTCMACCCCGGTACGAG                                          | 3'GALA7                                |
| oNP291                       | GGGGACAAGTTTGTACAAAAAAGCAGGCTTCGAAGGAGATAGAACCATG                        | 5' adaptor with attB1                  |
| oNP292                       | GGGGACCACTTTGTACAAGAAAGCTGGGTC                                           | 3' adaptor with attB2                  |
| oPR101                       | ACGTTCCATTCCCTGTAGGGTGGGCGCG                                             | 5'GALA1 STOP site-directed mutagenesis |
| oPR102                       | CGCGCCACCCTACAGGGAATGGAACGT                                              | 3'GALA1 STOP site-directed mutagenesis |
| oPR103                       | ACGCTGCGGATTTAGGGTGGGCGCGCCG                                             | 5'GALA3 STOP site-directed mutagenesis |
| oPR104                       | CGGCGCGCCACCCTAAATCCGCAGCGT                                              | 3'GALA3 STOP site-directed mutagenesis |
| <b>CGH microarray probes</b> |                                                                          |                                        |
| RSp0914                      | CGGCGAACAGATCGGAGACCTGGCATGGCAAGAGTTGATGGCATCGGTTGACCGGAGCGGCATGACGTTTC  | probe GALA1                            |
| RSp0914A                     | TACCAAGACCTTGCACAGGATGCGCGCCGTCAGCAAGACCCTGAAGGCGGCGGCAGACACCGAGATCCG    | probe GALA1                            |
| RSp0914B                     | TCGATCTCGGCTTCAACGCCATCGGCCGATGAGGGGCTGCAAGCACTGGCCACCAACACCTCGCTCACCTC  | probe GALA1                            |
| RSp0914C                     | AAGCACTGGCTGCCAATCGCAGCCTGACCAAGCTCAATATCAGCCAGAATGACATCCGGTCCGCGGGCGC   | probe GALA1                            |
| RSp0672                      | CGGGAAACCAGGTGGAGCAAGACGGTTACGACAAGACCGCCAACAACATCACCGCGCAAGGGCCTGGGC    | probe GALA2                            |
| RSp0672A                     | GCGCCAAATCGTTCGGGGCGATCGCGTATCTCGCCGGCTTGCCGCTGGAGTCGCTCAATGTGGCGGG      | probe GALA2                            |
| RSp0672B                     | GCCGTCGGTGCAGCACCTGGACCTGAGCGGATGCACCGGCTCCGCGGTCTCGGAGGCGGGCCTGGCT      | probe GALA2                            |
| RSp0672C                     | CGGAGGCTGGCGGCAAACCGCACGCTCGTCTCGCTGGACCTGCGCGGCAACACCATCGACGTCGCCC      | probe GALA2                            |
| RSp0028                      | CGCCTCGTTGGACGTGGGTGCCAACAAGCTGGACCCCGACAGCTTGCGCATGCTGCTCACGCAGATGAAC   | probe GALA3                            |
| RSp0028A                     | TTTCAGTGAATCGGCACGGCCCGTCTGCCCCAGGATGTCGGCCACGGTCGGCTTCAGCGGACGTCG       | probe GALA3                            |
| RSp0028B                     | GGAAGTCGGCATCCGGCAATTGATCGTCAAGACCCCGGAGGGTCTCGCGGCGGTCAAGCGCCAGGCAGC    | probe GALA3                            |
| RSp0028C                     | TTTCGGTGAATCGGGCAACCCGGTCATGGCCCAGGATGTCAGCCCACCGCCGGTTCCGGCGGACGCGC     | probe GALA3                            |
| RSp0028D                     | TCGACGCCTGAGGGCCTTGCAGCGGTCAAGCGCGCAGGCAACTATCCGGTCTGAAAGCGCTGACGCTCG    | probe GALA3                            |
| RSc1800                      | CAGGCCCTGGCTGCCAACGATACGCTCGTCAACCCTGGATGCCAGCGCCAACCTGGATCGGAGACCCGGGCG | probe GALA4                            |
| RSc1800A                     | CGGAGATCTGGACGGAAATCGCGCGCGGCACCAAGCCCGCGGACATGCAAAGCCTGCGCGCCGTCAGCCG   | probe GALA4                            |
| RSc1800B                     | GCTCGGGCACTGGCCGCCAGCCAGACGCTCACCCGACTGGACCTGCGCTACAACGAGATCGGGGTCG      | probe GALA4                            |

Table S2 (continued): Oligonucleotides used in this study

| CGH microarray probes (continued) |                                                                        |             |
|-----------------------------------|------------------------------------------------------------------------|-------------|
| RSc1800C                          | GGAGATGTGGATGGAAGTCGCGCTCAAGTCCGAGCCTGCGGCCGTTCAACAGATGCGCGCGGTCAGCAAG | probe GALA4 |
| RSc1800D                          | CCGCATTCGCGCGCAACAAGAAGCTGACCACCCTCAACGTCAGCAGCAACGGGATCGGGCCGGTGGGGGT | probe GALA4 |
| RSc1801                           | GGTGTGCTCGACCTGCGCAACAACAGGATGGAAGAATCTGGTACGCGAGCGTCTGGCCAACCGCACG    | probe GALA5 |
| RSc1801A                          | TTTTGCGCGCGGGCAACTATCCGGCCCTGGAGAAGCTGACGCTTGCCGGCACGTTACGGACGACGATCT  | probe GALA5 |
| RSc1801B                          | AACACGAAGCTGACCACGCTCGATCTCGGCTACAACGACATCGGCGATGCCGGCGTGCGGGCGTTGAGCG | probe GALA5 |
| RSc1801C                          | GTCAAGCGCGCCGGCAACTATCCGGCCCTGGAGAACTCACGCTCGCCGGCGCTTTCACGGACGCTGACT  | probe GALA5 |
| RSc1801D                          | GCACTGGCCGCAATACGAGGCTGGCATCGCTCGACCTGCGCAACAACCGGATGCTGGAAGCGGGTGTGC  | probe GALA5 |
| RSc1356                           | GCGCGCAATGTCGTGCTCCAATCTCTCAATCTGAGCTACAACCCCATCGGCTTCTGGGGCGTCAACGCTC | probe GALA6 |
| RSc1356A                          | GTACCCGGCGCTCAAGAGCGTGCCTTCAAGGGGGAGCTCACGCTCGAGGCGTGAAAGCCTTGCCGCCA   | probe GALA6 |
| RSc1356B                          | TCTCGCTCAATCTGCACAACAACGAGATCGGCAACGAGGGCGCGCTGGTGCTGGCTACAAGCCGGACGCT | probe GALA6 |
| RSc1356C                          | GCGCCAAGGTGCTGGAGGCCAATACCCGGATCACGGGCACGCCGAGAACCCGAATTCCTGGCGGAGGA   | probe GALA6 |
| RSc1356D                          | CGGTGCGCAGCAATTGGCGAAAAGCGCCACGTTGACCGAGCTCGACCTGAGCGAGAACCGCATCGGTCCC | probe GALA6 |
| RSc1357                           | CGGCGCGACAGCAGGAGCAAGACGAGTTTGACACGACGGCCAACGAAATCACAGAGAACGGGACGCGGGC | probe GALA7 |
| RSc1357A                          | GGTCAGCACCACCATGAATGATGCCGCCGATCGAGCCAGACGCACATGCAGGCCTGGAACAAGGCGATG  | probe GALA7 |
| RSc1357B                          | CAAGGCGATGCTCGGCCAACTGCATCGCTATCCCAACCTGCAAAGCCTGCGTCTGCGGGGCGACATCACG | probe GALA7 |
| RSc1357C                          | ATCTGGCGACCAGCGAGTCCAGACGCTTCGCCTGTGCTGCTGCGGTGTCACCGATCCCGGCATCCA     | probe GALA7 |

Table S3: GALA accession numbers and position of *hrpII* motif in *GALA* promoters

| GALA names           | accession     | hrpII box position from atg |
|----------------------|---------------|-----------------------------|
| <b>IP01609_GALA2</b> | CAQ59390      | 91                          |
| IP01609_GALA3        | CAQ58784      | 99                          |
| IP01609_GALA4        | JF801741      | 341                         |
| IP01609_GALA5        | CAQ61423      | NA                          |
| IP01609_GALA6        | CAQ61617      | 93                          |
| IP01609_GALA7        | CAQ61616      | 93                          |
| CFBP2957_GALA2       | CBJ53541      | 91                          |
| CFBP2957_GALA3       | CBJ52829      | 99                          |
| CFBP2957_GALA4       | CBJ43095      | 88                          |
| CFBP2957_GALA5       | CBJ43096      | NA                          |
| CFBP2957_GALA6       | CBJ43268      | 412                         |
| CFBP2957_GALA7       | CBJ43267      | 96                          |
| CMR15_GALA1          | CBJ39793      | 152                         |
| <b>CMR15_GALA2</b>   | CBJ40290      | 91                          |
| CMR15_GALA3          | CBJ39687      | 101                         |
| CMR15_GALA4          | CBJ38006      | 372                         |
| CMR15_GALA5          | CBJ38007      | NA                          |
| CMR15_GALA6          | CBJ38610      | 97                          |
| CMR15_GALA7          | CBJ38611      | 96                          |
| CMR15_GALA8          | CBJ36437      | ND                          |
| GMI1000_GALA1        | CAD18065      | NA                          |
| GMI1000_GALA2        | CAD17823      | 91; 228                     |
| GMI1000_GALA3        | CAD17179      | 101                         |
| GMI1000_GALA4        | CAD15502      | 93                          |
| GMI1000_GALA5        | CAD15503      | NA                          |
| GMI1000_GALA6        | CAD15058      | 97                          |
| GMI1000_GALA7        | CAD15059      | 93                          |
| Molk2_GALA2          | CAQ36581      | 91                          |
| Molk2_GALA3          | CAQ18416      | 99                          |
| Molk2_GALA4          | CAQ35674      | 88                          |
| Molk2_GALA5          | CAQ35673      | NA                          |
| Molk2_GALA6          | CAQ18765      | 72                          |
| Molk2_GALA7          | CAQ35472      | 93                          |
| PSI07_GALA1-1        | CBJ35381      | 135                         |
| PSI07_GALA1-2        | CBJ35382      | NA                          |
| PSI07_GALA1-3        | RPSI07_mp0894 | NA                          |
| PSI07_GALA2          | CBJ35242      | ND                          |
| PSI07_GALA3          | CBJ34399      | 393                         |
| PSI07_GALA4          | RPSI07_1840   | 138                         |
| PSI07_GALA5          | CBJ51205      | NA                          |
| PSI07_GALA6          | CBJ51374      | 93                          |
| PSI07_GALA7          | CBJ51373      | 97                          |
| RS1000_GALA1         | BAD42410      | ND                          |
| RS1000_GALA2         | BAD42399      | ND                          |
| RS1000_GALA3         | BAH47287      | ND                          |
| RS1000_GALA4         | BAD42394      | ND                          |
| RS1000_GALA5         | BAD42395      | NA                          |
| RS1000_GALA6         | BAD42392      | ND                          |
| RS1000_GALA7         | BAD42393      | 93                          |

NA: not applicable

ND: not detected

Table S4: Comparative Genomic Hybridization analysis of *GALA* distribution<sup>a</sup> in 60 *R. solanacearum* strains

| Phylotype | Strain                | GALA1 | GALA2 | GALA3 | GALA4 | GALA5 | GALA6 | GALA7 |
|-----------|-----------------------|-------|-------|-------|-------|-------|-------|-------|
| IV        | ACH732                | 0     | 0     | 0     | 1     | 1     | 1     | 0     |
|           | Psi07 <sup>b</sup>    | 1     | 1     | 1     | 1     | 1     | 1     | 1     |
|           | MAFF301558            | 0     | 0     | 1     | 1     | 1     | 0     | 1     |
| I         | R288                  | 0     | 1     | 1     | 1     | 1     | 1     | 0     |
|           | PSS219                | 1     | 1     | 1     | 1     | 1     | 1     | 1     |
|           | PSS81                 | 1     | 1     | 1     | 1     | 1     | 1     | 1     |
|           | JT519                 | 0     | 1     | 1     | 1     | 1     | 1     | 0     |
|           | JT519                 | 1     | 1     | 1     | 1     | 1     | 1     | 1     |
|           | GMI1000 <sup>b</sup>  | 1     | 1     | 1     | 1     | 1     | 1     | 1     |
|           | CMR134                | 1     | 1     | 1     | 1     | 1     | 1     | 0     |
|           | PSS358                | 1     | 1     | 1     | 1     | 1     | 1     | 1     |
| III       | PSS190                | 1     | 1     | 1     | 1     | 1     | 1     | 1     |
|           | CFBP3059              | 0     | 1     | 1     | 1     | 1     | 1     | 0     |
|           | CMR15 <sup>b</sup>    | 0     | 1     | 1     | 1     | 1     | 1     | 0     |
|           | CMR32                 | 0     | 1     | 1     | 1     | 1     | 1     | 0     |
|           | NCPPB1029             | 0     | 1     | 1     | 1     | 1     | 1     | 1     |
|           | CFBP734               | 0     | 1     | 1     | 1     | 1     | 1     | 1     |
|           | J25                   | 0     | 1     | 1     | 1     | 1     | 0     | 1     |
|           | NCPPB342              | 0     | 1     | 1     | 1     | 1     | 0     | 1     |
|           | NCPPB332              | 0     | 1     | 1     | 1     | 1     | 1     | 1     |
|           | JT528                 | 0     | 1     | 1     | 1     | 1     | 0     | 1     |
|           | JT525                 | 0     | 1     | 1     | 1     | 1     | 0     | 1     |
|           | CMR66                 | 0     | 1     | 1     | 1     | 1     | 1     | 1     |
|           | CIP358                | 0     | 1     | 1     | 1     | 1     | 1     | 1     |
|           | CMR43                 | 0     | 1     | 1     | 1     | 1     | 1     | 1     |
| II_A      | ICMP7963              | 0     | 0     | 1     | 1     | 1     | 0     | 1     |
|           | ISBSF1900             | 0     | 1     | 1     | 1     | 1     | 1     | 0     |
|           | CMR39                 | 0     | 1     | 1     | 1     | 1     | 1     | 1     |
|           | UW21                  | 0     | 1     | 1     | 1     | 1     | 1     | 0     |
|           | CFBP2957 <sup>b</sup> | 0     | 1     | 1     | 1     | 1     | 1     | 1     |
|           | CIP301                | 0     | 1     | 1     | 1     | 1     | 1     | 0     |
|           | CIP239                | 0     | 1     | 1     | 1     | 1     | 1     | 0     |
|           | B34                   | 0     | 1     | 1     | 1     | 1     | 1     | 1     |
| II_B      | A3909                 | 0     | 1     | 1     | 1     | 0     | 1     | 1     |
|           | CFBP7014              | 0     | 1     | 1     | 1     | 1     | 1     | 1     |
|           | ISBSF1503             | 0     | 1     | 1     | 1     | 1     | 1     | 1     |
|           | NCPPB3987             | 0     | 1     | 1     | 1     | 1     | 1     | 1     |
|           | ISBSF1712             | 0     | 1     | 1     | 1     | 1     | 1     | 1     |
|           | CIP10                 | 0     | 1     | 1     | 1     | 1     | 1     | 1     |
|           | Mok2 <sup>b</sup>     | 0     | 1     | 1     | 1     | 1     | 1     | 1     |
|           | CIP418                | 0     | 1     | 1     | 1     | 1     | 1     | 1     |
|           | UW163                 | 0     | 1     | 1     | 1     | 1     | 1     | 1     |
|           | Ant307                | 0     | 1     | 1     | 1     | 1     | 1     | 1     |
|           | Ant80                 | 0     | 1     | 1     | 1     | 1     | 1     | 1     |
|           | Ant75                 | 0     | 1     | 1     | 1     | 1     | 1     | 1     |
|           | JY201                 | 0     | 1     | 1     | 1     | 1     | 1     | 1     |
|           | JY200                 | 0     | 1     | 1     | 1     | 1     | 1     | 1     |
|           | Ant1121               | 0     | 1     | 1     | 1     | 1     | 1     | 1     |
|           | IPO1609 <sup>b</sup>  | 0     | 1     | 1     | 1     | 1     | 1     | 1     |
|           | JT516                 | 0     | 1     | 1     | 1     | 1     | 1     | 1     |
|           | CMR34                 | 0     | 1     | 1     | 1     | 1     | 1     | 1     |
|           | RE                    | 0     | 1     | 1     | 1     | 1     | 1     | 1     |
|           | AP42H                 | 0     | 1     | 1     | 1     | 1     | 1     | 1     |
|           | TB1H                  | 0     | 1     | 1     | 1     | 1     | 1     | 1     |
|           | TB2H                  | 0     | 1     | 1     | 1     | 1     | 1     | 1     |
|           | TC1H                  | 0     | 1     | 1     | 1     | 1     | 1     | 1     |
|           | AP31H                 | 0     | 1     | 1     | 1     | 1     | 1     | 1     |
| TB10      | 0                     | 1     | 1     | 1     | 1     | 1     | 1     |       |
| ETAC      | 0                     | 1     | 1     | 1     | 1     | 1     | 1     |       |
| RM        | 0                     | 1     | 1     | 1     | 1     | 1     | 1     |       |

<sup>a</sup> Presence/absence analysis: 1 stands for presence whereas 0 stands for absence

<sup>b</sup> In red: strains for which whole genome sequence is available
